# Supplementary material for: Denitrifying metabolism of the methylotrophic marine bacterium Methylophaga nitratireducenticrescens strain JAM1
Source: PeerJ. 2017 Nov 28;5:e4098. doi: 10.7717/peerj.4098 (PMC5710167; doi:10.7717/peerj.4098)
Supplement: Data S1 [file peerj-05-4098-s002.xlsx]

## Sheet: Figure 1
	Panel A			Triplicate cultures
	Time (h)		N20 "mg-N vial-1"			Ctrl "mg-N vial-1"			OD600nm
	0		30	29.6	37	30.6			0.023	0.021	0.024
	1		28.7	35.7	42.9				0.031	0.047	0.04
	2								0.04	0.044	0.045
	6	4	36.2	28.4	22.4
	6
	10
	14		20.9	22.3	14.1				0.195	0.201	0.198
	24		15.9	16.6	14.1				0.23	0.234	0.242
	30		10.8	10.6	10.9				0.246	0.268	0.252
	36		6.6	3.6	8.2	24.3	22.9	24.7	0.288	0.295	0.264
	48		0.7	0.3	4.9				0.306	0.296	0.263
	56		3.5	2.2	3.9				0.287	0.276	0.256
	72		0.3	0.2	1	25.7	27.1	27.3	0.234	0.212	0.203
	Panel B
	Time (h)	NO3- "mg-N vial-1"			NO2- "mg-N vial-1"			OD600nm
	0	18.84	18.99	19.02	0.09	0	0	0.011	0.012	0.015
	2	18.74	18.98	18.77	0.17	0	0	0.025	0.034	0.039
	4	18.81	18.59	19.02	0.45	0.31	0.33	0.049	0.041	0.04
	6	17.87	18.1	18.14	0.77	0.59	0.74
	8	17.13	17.57	17.56	1.69	1.35	1.62	0.057	0.059	0.058
	10	16.11	17.37	16.75	2.98	2.48	2.76
	15	10.92	12.72	12.44	8.32	6.45	7.34	0.076	0.072	0.069
	24	1.18	1.62	2.16	17.95	18.24	17.02	0.101	0.112	0.091
	30	0	0.12	0.08	19.59	19.19	18.9	0.123	0.133	0.128
	36	0	0	0.06	18.56	18.1	18.43	0.212	0.173	0.168
	48	0	0	0	17.26	17.68	17.36	0.216	0.215	0.202
	54	0	0	0	16.83	17	16.65	0.231	0.248	0.225
	72	0	0	0	15.78	15.4	15.62	0.225	0.223	0.239

## Sheet: Figure 2
		Triplicate cultures
Time (h)	N2O "mg-N vial-1"			OD (N2O)			OD (NO3-)			OD (no N2O or NO3-)
0	3.5901	3.59573	3.77101	0.044	0.047	0.058	0.33	0.03	0.039	0.055	0.055	0.051
24	0.0249847	0.0107077	0.0089231	0.8	1.13	0.81	1.27	1.13	0.89	1	1.06	0.98
44				1	1.12	1.32
48	0.00446155	0.000535386	8.9231e-05				1.28	1.2	1	0.94	0.96	1.26
72	0.00446155	0.00089231	0.00803079				1.26	1.19	1.2	1	1.07	1.17
90				1.24	1.28	1.32
96										1.18	1.1	1.19
				OD 600 nm

## Sheet: Figure 3
Panel A			Triplicate cultures												abiotic control with 18.2 mg-N/ vial of nitrite
Time (h)	NO3- "mg-N vial-1"			NO2- "mg-N vial-1"			N20 "mg-N vial-1"			N2 "mg-N vial-1"				Time (h)	N20 "mg-N vial-1"
0	19.59	19.26	18.93	0	0.08	0.4	0	0	0					0	0	0	0
17	3.37	4.86	6.43	15.39	14.53	13.07	0.0015	0.001	0.001	1.08739	0.626396	0.595		2	0	0	0
55	0	0	0	17.37	17.68	17.54	0.6443	0.5257	0.9307		1.11878	0.998559		4	0	0	0
79	0.14	0.37	0.08	15.94	16.21	16.33	0.1707	0.0205	0.7575	1.89604	1.16779	1.04833		8	0	0	0
127	0	0.05	0	15.45	16.51	15.78	0.0115	0.013	0.011	1.46338	2.16788	2.15027		20	0.000287792	0.000270772	0.000358966
														24	0.00038527	0.000353551	0.000455671
														30	0.000396101	0.000392233	0.000463407
Panel B														42	0.000620455	0.000656816	0.000704781
														66	0.0010916	0.000974779	0.00112409
Time (h)	NO3- "mg-N vial-1"			NO2- "mg-N vial-1"			N20 "mg-N vial-1"							90	0.00138713	0.00140337	0.00149311
0	15.31	17.51	19.52	0.46	0.44	0.52	0	0	0					114	0.00178864	0.00158518	0.00179406
24	0	0	0.18	16.62	16.07	16.43	0.0503	0.0314	0.0165
48	0.65	0.1	0.1	16.53	18.73	18.72	0.1132	0.0912	0.3647
72	0	0	0.16	15.65	17.66	19.42	0.1242	0.1061	0.5644
96	0.09	0.11	0.25	15.19	17.39	17.38	0.1352	0.1116	0.6831

## Sheet: Figure 4
					Triplicate cultures
Panel A
Time (h)	NO3- "mg-N vial-1"			NO2- "mg-N vial-1"			N20 "mg-N vial-1"			N2 "mg-N vial-1"
0	18.81	18.63	19.71	0	0	0	0	0	0
17										1.03685
24	0	0.58	1.89	19.02	18.87	17.52	0.0055	0.0032	0.0021
30							0.0017	0.0022	0.0019
48	0	0	0	16.64	16.19	17.46	0.0056	0.1786	0.0673
54							0.0155	0.3675	0.1742	1.27194		1.27577
74							0.1413	0.5123	0.2479
77	0	0	0.43	15.19	15.46	16.22	0.1716	0.3415	0.1881	1.60351		1.62266
96	0	0	0.41	12.26	13.05	13.14	0.0114	0.0179	0.049
101							0.0123	0.017	0.0429
127										2.13955		1.74135
168	0.4	0.46	0	11.92	11.46	11.83	0	0	0
Panel B
Time (h)	NO3- "mg-N vial-1"			NO2- "mg-N vial-1"			N20 "mg-N vial-1"
0	22.02	20.18	21.84	0	0.16	0	0	0	0
24	2.33	6.42	0.51	13.77	9.23	15.12	0.0052	0.0016	0.0179
48	1.56	6.64	0.45	14.72	9.57	15.06	0.0157	0.0055	0.1049
72	1.41	6.45	0.42	14.66	9.73	14.78	0.0178	0.0056	0.1057
96	1.46	6.32	0.41	14.3	9.63	15.04	0.0165	0.0058	0.1099

## Sheet: Figure 5
	N20 "mg-N vial-1"
Time (h)	0 mM SNP			2mM SNP			5 mM SNP			Ctl -			Autoclaved biomass
0	0	0	0	0	0	0	0	0	0	0	0	0	0.00066	0.00069	0.00068
24	0.00047	0	0	0.0007	0.00058	0.00078	0.00105	0.00069	0.00129	0.0005	0.00045	0.00018	0.00079	0.00079	0.00092
48	0	0	0.00031	0.00108	0.00125	0.00108	0.00447	0.00486	0.00587	0.00063	0.00039	0.00053	0.00071	0.00071	0.00079
72	0.00039	0	0	0.00241	0.00227	0.00274	0.00713	0.00781	0.00788	0.00079	0.00066	0.00049	0.00071	0.00065	0.00064
96	0.00055	0	0.00039	0.00354	0.00344	0.00416							0.00085	0.001	0.0009
144							0.01049	0.01217	0.01032	0.00072	0.0007	0.00067
168	0.00094	0	0.00039	0.00618	0.00605	0.00729	0.01286	0.01337	0.01206	0.0007	0.0007	0.00061
			Triplicate cultures

## Sheet: Figure 6
		Targeted genes						Reference genes			Value ajustment to the rpoD level
Phase	Replicate	norB1	norB2	nnrS	norR	nosZ	nr	dnaG	rpoB	rpoD	dnaG	rpoB	rpoD
		copies of gene per 250 ng cDNA
Preculture	Rep1	5600	10690	3920	8280	48670	16030	3530	1153	16027	26026.5	27160	16027
	Rep2	4100	8610	3960	6300	30230	6210	1330	497	12717	9806	11707.3	12717
	Rep3	4200	5150	6030	5680	39150	38023	1680	397	19475	12386.5	9351.71	19475
								6540	2047	48219	48219	48219	48219	Summation
Growth phase	Rep1	189510	39740	45070	43070	442220	11663	47630	35220	50048	63223.7	27381.2	50048
	Rep2	407740	56290	53770	64020	758530	138896	42770	73081	56529	56772.6	56815.7	56529
	Rep3	337870	58630	65840	78170	1656740	74063	52340	172504	85884	69475.7	134110	85884
	Rep4	299730	34080	456250	38960	515240	61000	24790	5236	29917	32906.1	4070.64	29917
								167530	286041	222378	222378	222378	222378	Summation
N2O accumulation	Rep1	112750	26710	92070	31250	58540	109979	6800	1298	62314	66230.3	32259.2	62314
	Rep2	88580	15660	128750	17580	58470	4466	4070	2211	57923	39640.8	54950.1	57923
	Rep3	2850	2100	6790	3330	9030	35451	470	593	6659	4577.68	14737.9	6659
	Rep4	76470	12420	111550	33960	69790	5289	5190	2376	34102	50549.3	59050.8	34102
								16530	6478	160998	160998	160998	160998	Summation
N2O consumption	Rep1	2850	820	4300	540	2940	871	600	160	2491	2973.78	852.663	2491
	Rep2	77010	14030	28530	7500	63240	2986	4170	1595	17857	20667.8	8499.98	17857
	Rep3	1590	1160	4640	1470	3930	4790	310	299	2767	1536.45	1593.41	2767
	Rep4	13910	1240	3100	960	5250	8351	480	3117	4442	2379.02	16610.9	4442
								5560	5171	27557	27557	27557	27557	Summation
	dnaG				rpoB				rpoD
	1) Normalization with dnaG				1) Normalization with rpoB				1) Normalization with rpoD
		Targeted gene value/corresponding ajusted dnaG value				Targeted gene value/corresponding ajusted rpoB value				Targeted gene value/corresponding ajustedrpoD value
	2) Transcription level relative to preculture				2) Transcription level relative to preculture				2) Transcription level relative to preculture
		Normalized value/preculture average value				Normalized value/preculture average value				Normalized value/preculture average value
Targeted genes	Pre-culture 1	Pre-culture 2	Pre-culture 3		Pre-culture 1	Pre-culture 2	Pre-culture 3		Pre-culture 1	Pre-culture 2	Pre-culture 3
norB1	0.663867	1.29001	1.04613		0.61517	1.0449	1.33993		1.18114	1.08984	0.729016
norB2	0.722912	1.54535	0.731739		0.702956	1.31352	0.98352		1.24402	1.26276	0.493212
nnrS	0.433954	1.1635	1.40254		0.38407	0.900127	1.7158		0.847683	1.07922	1.0731
norR	0.672535	1.35813	0.969336		0.63059	1.11312	1.25629		1.18885	1.14	0.67115
nosZ	0.691466	1.13989	1.16864		0.627994	0.904934	1.46707		1.22711	0.960567	0.812323
nr	0.986101	1.0139			1.05332	0.946679			0.872025	0.42575	1.70222
	Growth 1	Growth 2	Growth 3	Growth 4	Growth 1	Growth 2	Growth 3	Growth 4	Growth 1	Growth 2	Growth 3	Growth 4
norB1	9.25135	22.1665	15.0096	28.1132	20.65	21.4116	7.51667		12.8	24.3825	13.2985	33.8671
norB2	1.10662	1.74559	1.48572	1.82338	2.59214	1.76946	0.780799		1.48096	1.85722	1.27324	2.12464
nnrS	2.05436	2.72941	2.73102		4.38019	2.51839	1.30642		3.12105	3.29661	2.65691
norR	1.44023	2.38404	2.37872	2.50313	3.25366	2.33073	1.20566		1.98033	2.60611	2.09448	2.99675
nosZ	2.58672	4.94111	8.81887	5.79066	5.65996	4.67871	4.3293		3.57047	5.4222	7.79501	6.9593
nr	0.295154	3.91442	1.70564	2.96602	0.760182	4.36172	0.985592		0.203176	2.14223	0.75186	1.7777
	Accum 1	Accum 2	Accum 3	Accum 4	Accum 1	Accum 2	Accum 3	Accum 4	Accum 1	Accum 2	Accum 3	Accum 4
norB1	5.25245	6.89432	1.92074	4.66744	10.428	4.80956		3.86368	6.11641	5.16952	1.44678	7.58013
norB2	0.709797	0.695284	0.807344	0.432438	1.47878	0.508984	0.254484	0.375643	0.799451	0.504248	0.588185	0.679274
nnrS	4.00524	9.35766	4.27325	6.35802	7.59489	6.23496	1.22599	5.02686	5.12073	7.70363	3.53395	11.3368
norR	0.997442	0.93749	1.53766	1.42019	2.00376	0.661756	0.467361	1.18956	1.15402	0.69842	1.15076	2.29159
nosZ	0.326825	0.545388	0.729338	0.510502	0.635954	0.372898	0.21472	0.414181	0.379613	0.407903	0.547965	0.826966
nr	2.65858	0.180372	12.3979	0.167516	6.08437	0.145047	4.29286	0.159847	1.53876	0.0672226	4.6416	0.13522
	Consump 1	Consump 2	Consump 3	Consump 4	Consump 1	Consump 2	Consump 3	Consump 4	Consump 1	Consump 2	Consump 3	Consump 4
norB1	2.95668	11.4961	3.19379	18.0399	9.96857	27.0312	2.97796	2.49844	3.86755	14.5782	1.94247	10.5856
norB2	0.485275	1.19474	1.32917	0.917366	1.7169	2.94794	1.30054	0.133323	0.613965	1.46539	0.781902	0.520651
nnrS	4.16574	3.97711	8.70345	3.75433	13.4145	8.93176	7.75098	0.496616	5.98266	5.53723	5.81177	2.4187
norR	0.383835	0.767105	2.0231	0.853039	1.30946	1.82511	1.90875	0.119542	0.498849	0.9665	1.22252	0.497326
nosZ	0.36553	1.13138	0.946059	0.815984	1.20788	2.60734	0.864572	0.110761	0.476923	1.43106	0.573928	0.47759
nr	0.468891	0.231306	4.99275	5.62004	1.82233	0.626943	5.36632	0.897221	0.304854	0.14579	1.5093	1.63911
	In grey: OUTLINERS (determined by Confidence intervals at 99%) WERE NOT PART OF THE CALCULATION

## Sheet: Table 2
								Control N2O
	Surface area*			Injected volume (ml)
	44N-N2O	45N-N2O	46N-N2O
Control N2O	3.98709	0.040404	0.0100569	4
15N-NO3 cultures	0	0	6.8642	0.01
15N-NH4 cultures	10.7595	0.0863388	0.176994	4
	*Normalized to 4 ml injected volume
	45/44	46/44
Control N2O	0.0101337	0.00252237
15N-NO3 cultures	na	na
15N-NH4 cultures	0.00802443	0.01645
	na: not applicable, 100% 46N-N2O
								15NH4 cultures
								15NO3 cultures
