# Supplementary material for: Denitrifying metabolism of the methylotrophic marine bacterium Methylophaga nitratireducenticrescens strain JAM1
Source: PubMed Central journal article supplement (PMC5710167; doi:10.7717/peerj.4098), 2017-11-28
Supplement: peerj-05-4098-s001.pdf [file peerj-05-4098-s001.pdf]

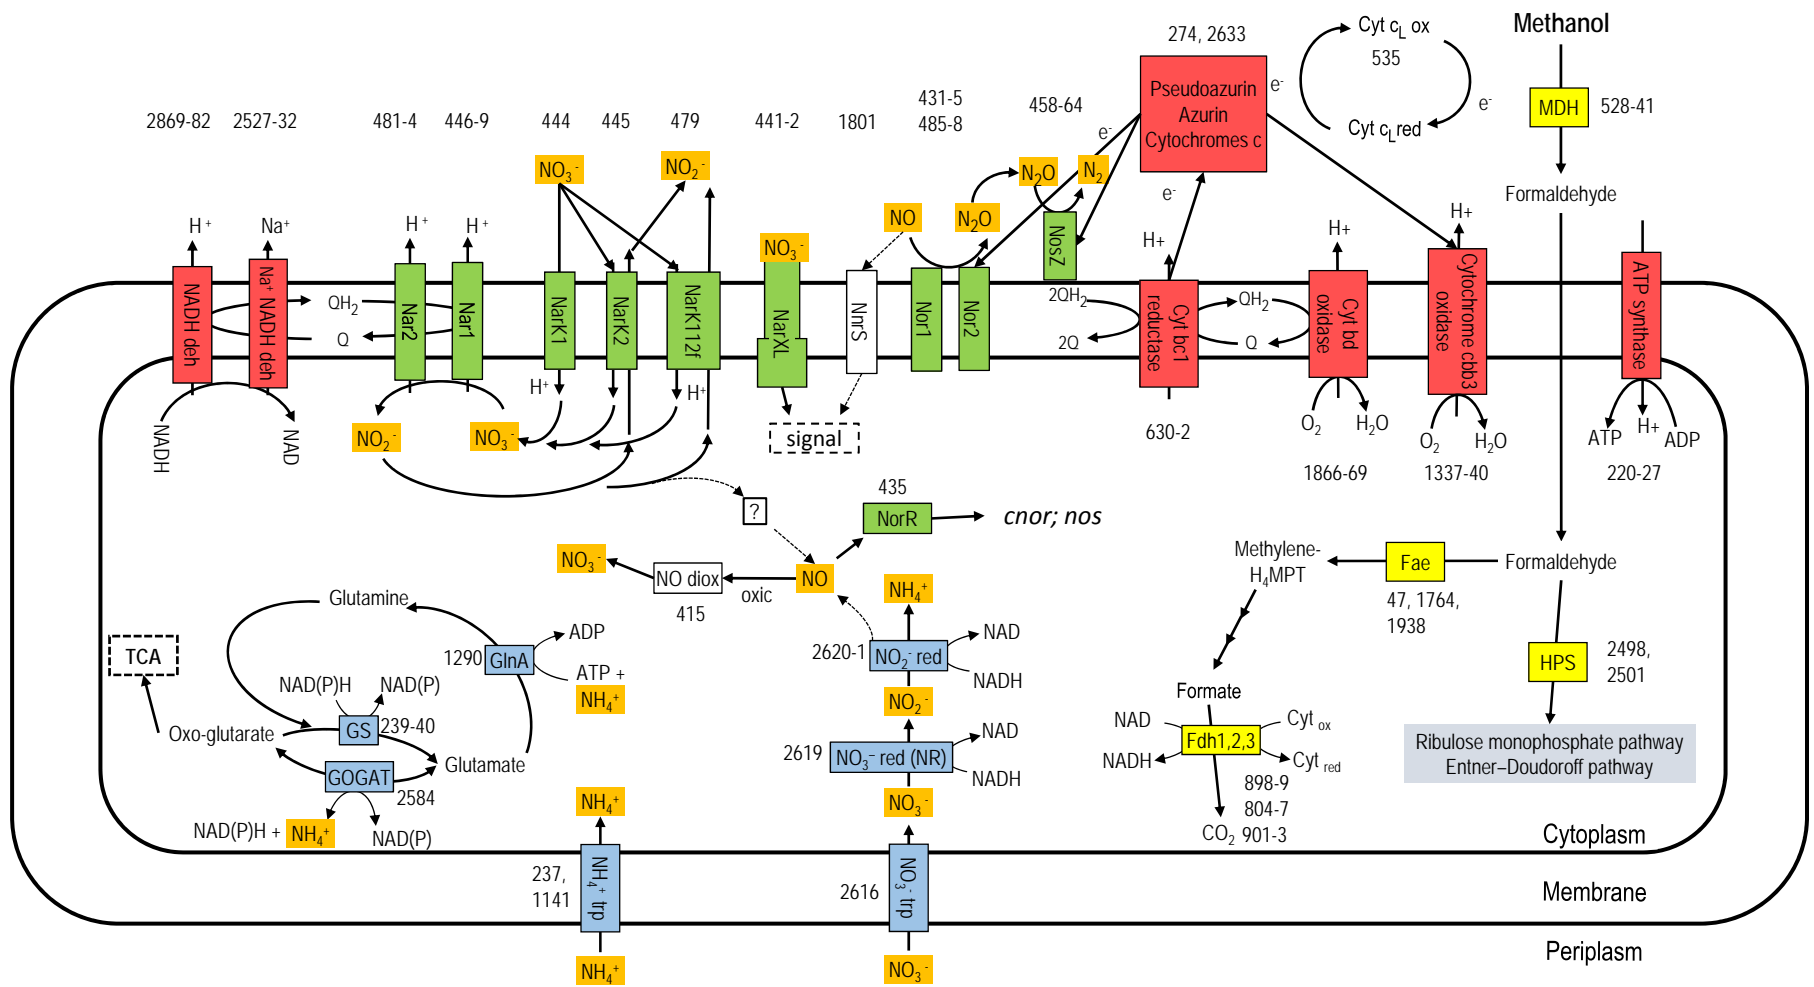

- Denitrification pathway
- NH<sub>4</sub><sup>+</sup> and NO<sub>3</sub><sup>-</sup> assimilatory pathways
- Respiratory pathways
- C1 metabolic pathway
